# Supplementary material for: Genome-wide Association Study Identifies Shared Risk Loci Common to Two Malignancies in Golden Retrievers
Source: PubMed Central journal article supplement (PMC4333733; doi:10.1371/journal.pgen.1004922), 2015-02-02
Supplement: pgen.1004922.s005.pdf [file pgen.1004922.s005.pdf]

### Supplementary Table 1. Haplotype block definitions

| haplotype               | SNPs            | position (chr 5) |
|-------------------------|-----------------|------------------|
| 29.7Mb-shared haplotype | BICF2G63035383  | 29613573         |
|                         | BICF2G63035403  | 29623349         |
|                         | BICF2G63035476  | 29699676         |
|                         | BICF2S23317145  | 29716926         |
|                         | BICF2P1405079   | 29748609         |
|                         | BICF2G63035510  | 29748871         |
|                         | BICF2G63035542  | 29762601         |
|                         | BICF2G63035564  | 29778962         |
|                         | BICF2G63035577  | 29795750         |
| 29.9Mb-shared haplotype | BICF2G63035700  | 29867304         |
|                         | BICF2G63035705  | 29870177         |
|                         | BICF2G63035726  | 29892306         |
|                         | BICF2G63035729  | 29893423         |
| 33Mb-shared haplotype   | BICF2G630183626 | 33851492         |
|                         | BICF2G630183630 | 33854327         |
|                         | BICF2G630183805 | 34088493         |
|                         | BICF2P267306    | 34106119         |
|                         | BICF2P1337948   | 34117726         |
| 33Mb-BLSA haplotype     | BICF2P639123    | 33001550         |
|                         | BICF2G630183354 | 33422865         |
|                         | BICF2G630183623 | 33845636         |
|                         | BICF2G630183652 | 33888351         |
