# Supplementary material for: Genome-wide Association Study Identifies Shared Risk Loci Common to Two Malignancies in Golden Retrievers
Source: PubMed Central journal article supplement (PMC4333733; doi:10.1371/journal.pgen.1004922), 2015-02-02
Supplement: pgen.1004922.s006.pdf [file pgen.1004922.s006.pdf]

## Supplementary Table 2. Coexistence of risk haplotypes at 29 and 33 Mb

### A. 29 Mb

Observed individuals (excluding those with a recombination on either haplotype)

|               |    | 29.7Mb-shared |     |    |
|---------------|----|---------------|-----|----|
|               |    | RR            | Ra  | aa |
| 29.9Mb-shared | RR | 127           | 9   | 0  |
|               | Ra | 0             | 134 | 9  |
|               | aa | 0             | 0   | 48 |

*R, risk. a, alternative (not risk)*

### B. 33 Mb

Observed individuals

|           |    | 33Mb-shared |    |     |
|-----------|----|-------------|----|-----|
|           |    | RR          | Ra | aa  |
| 33Mb-BLSA | RR | 3           | 0  | 0   |
|           | Ra | 3           | 40 | 0   |
|           | aa | 3           | 56 | 250 |

*R, risk. a, alternative (not risk)*
