# Supplementary material for: Genome-wide Association Study Identifies Shared Risk Loci Common to Two Malignancies in Golden Retrievers
Source: PubMed Central journal article supplement (PMC4333733; doi:10.1371/journal.pgen.1004922), 2015-02-02
Supplement: pgen.1004922.s007.pdf [file pgen.1004922.s007.pdf]

**Supplementary Table 3. Frequency of risk haplotypes**

| 29.7Mb-shared haplotype |           |                 |                   |                     |
|-------------------------|-----------|-----------------|-------------------|---------------------|
|                         | # samples | Homozygous risk | Heterozygous risk | Homozygous non-risk |
| HSA                     | 142       | 0.46            | 0.42              | 0.09                |
| BLSA                    | 41        | 0.49            | 0.32              | 0.12                |
| combined cases          | 183       | 0.47            | 0.40              | 0.10                |
| controls                | 172       | 0.25            | 0.47              | 0.23                |
| 29.9Mb-shared haplotype |           |                 |                   |                     |
|                         | # samples | Homozygous risk | Heterozygous risk | Homozygous non-risk |
| HSA                     | 142       | 0.51            | 0.42              | 0.07                |
| BLSA                    | 41        | 0.46            | 0.41              | 0.12                |
| combined cases          | 183       | 0.50            | 0.42              | 0.08                |
| controls                | 172       | 0.28            | 0.49              | 0.23                |
| 33Mb-shared haplotype   |           |                 |                   |                     |
|                         | # samples | Homozygous risk | Heterozygous risk | Homozygous non-risk |
| HSA                     | 142       | 0.04            | 0.34              | 0.57                |
| BLSA                    | 41        | 0.07            | 0.39              | 0.51                |
| combined cases          | 183       | 0.05            | 0.35              | 0.56                |
| controls                | 172       | 0.00            | 0.19              | 0.79                |
| 33Mb-BLSA haplotype     |           |                 |                   |                     |
|                         | # samples | Homozygous risk | Heterozygous risk | Homozygous non-risk |
| HSA                     | 142       | 0.01            | 0.11              | 0.82                |
| BLSA                    | 41        | 0.02            | 0.34              | 0.56                |
| combined cases          | 183       | 0.02            | 0.16              | 0.76                |
| controls                | 172       | 0.00            | 0.08              | 0.91                |
