# Supplementary material for: Genome-wide Association Study Identifies Shared Risk Loci Common to Two Malignancies in Golden Retrievers
Source: PubMed Central journal article supplement (PMC4333733; doi:10.1371/journal.pgen.1004922), 2015-02-02
Supplement: pgen.1004922.s008.pdf [file pgen.1004922.s008.pdf]

**Supplementary Table 4. Variance explained by chromosome 5 or all autosomes, as estimated by REML**

|                         | <i>variance explained</i> | <i>SE</i> | <i>p</i> | <i>variance explained, sex as covariate</i> | <i>SE</i> | <i>p</i> |
|-------------------------|---------------------------|-----------|----------|---------------------------------------------|-----------|----------|
| <b>Hemangiosarcoma</b>  |                           |           |          |                                             |           |          |
| all autosomes           | 0.37                      | 0.18      | 2.40E-03 | 0.40                                        | 0.18      | 1.32E-03 |
| only chr 5              | 0.26                      | 0.10      | 3.45E-04 | 0.25                                        | 0.10      | 2.91E-04 |
| chr 5, 25-40 Mb         | 0.18                      | 0.10      | 7.08E-05 | 0.18                                        | 0.10      | 4.23E-05 |
| <b>B-cell lymphoma</b>  |                           |           |          |                                             |           |          |
| all autosomes           | 1.11                      | 0.48      | 6.55E-03 | 1.12                                        | 0.46      | 2.41E-03 |
| only chr 5              | 0.22                      | 0.18      | 7.72E-02 | 0.13                                        | 0.15      | 1.86E-01 |
| chr 5, 25-40 Mb         | 0.63                      | 0.25      | 1.66E-04 | 0.60                                        | 0.25      | 5.76E-04 |
| <b>combined dataset</b> |                           |           |          |                                             |           |          |
| all autosomes           | 0.41                      | 0.17      | 8.52E-04 | 0.43                                        | 0.17      | 6.58E-04 |
| only chr 5              | 0.21                      | 0.09      | 6.79E-04 | 0.19                                        | 0.09      | 1.19E-03 |
| chr 5, 25-40 Mb         | 0.23                      | 0.11      | 2.17E-05 | 0.22                                        | 0.11      | 2.76E-05 |
