# Supplementary material for: Genome-wide Association Study Identifies Shared Risk Loci Common to Two Malignancies in Golden Retrievers
Source: PubMed Central journal article supplement (PMC4333733; doi:10.1371/journal.pgen.1004922), 2015-02-02
Supplement: pgen.1004922.s009.pdf [file pgen.1004922.s009.pdf]

**Supplementary Table 5. List of germ-line non-synonymous mutations in genes at the 29 and 33 loci**

| Gene name    | Non-synonymous change    | CanFam3.1 position | Reason for disqualification as candidate                                                                                                                                                                                                                     |
|--------------|--------------------------|--------------------|--------------------------------------------------------------------------------------------------------------------------------------------------------------------------------------------------------------------------------------------------------------|
| KIAA1377     | C -> T, likely in intron | 29,591,154         | not concordant with any of the four risk haplotypes or with phenotype                                                                                                                                                                                        |
|              | G -> A, likely in intron | 29,660,431         | not concordant with any of the four risk haplotypes or with phenotype                                                                                                                                                                                        |
| ANGPTL5      | cAa (Q) -> cGa (R)       | 29,668,080         | not concordant with any of the four risk haplotypes or with phenotype                                                                                                                                                                                        |
| TRPC6        | A -> G, 5' UTR           | 29,975,006         | not concordant with any of the four risk haplotypes or with phenotype                                                                                                                                                                                        |
|              | C -> T, 5' UTR           | 29,975,035         | not concordant with any of the four risk haplotypes or with phenotype                                                                                                                                                                                        |
| NTN1         | gGc (G) -> gCc (A)       | 33,655,616         | not concordant with any of the four risk haplotypes or with phenotype                                                                                                                                                                                        |
|              | Tgc (C) -> Ggc (G)       | 33,655,720         | not concordant with any of the four risk haplotypes or with phenotype                                                                                                                                                                                        |
| WDR16/CFAP52 | Ggc (G) -> Agc (S)       | 34,121,952         | Concordant with shared-33Mb haplotype, not with BLSA-33Mb haplotype. The amino acid change is predicted to be 'tolerated' by SIFT analysis. The risk allele is the allele that is conserved across mammals. SNP location 4.5 kb outside core risk haplotype. |
