# Supplementary material for: Genome-wide Association Study Identifies Shared Risk Loci Common to Two Malignancies in Golden Retrievers
Source: PubMed Central journal article supplement (PMC4333733; doi:10.1371/journal.pgen.1004922), 2015-02-02
Supplement: pgen.1004922.s010.pdf [file pgen.1004922.s010.pdf]

**Supplementary Table 6. Differentially expressed genes by the risk haplotype at each locus**

| <b>29 Mb risk analysis</b> |                       |          |          |     |                  |
|----------------------------|-----------------------|----------|----------|-----|------------------|
| Gene Name                  | logFC <sub>risk</sub> | p-value  | FDR      | Chr | Start first exon |
| TRPC6                      | -7.46                 | 7.45E-17 | 1.37E-12 | 5   | 29,974,951       |
| FGFR4                      | -4.37                 | 1.46E-07 | 8.96E-04 | 4   | 36,241,080       |
| RPL6                       | 1.74                  | 2.78E-07 | 1.28E-03 | 26  | 9,970,456        |
| PIK3R6                     | -1.69                 | 3.88E-07 | 1.43E-03 | 5   | 33,471,196       |
| GFRA2                      | -3.72                 | 9.26E-07 | 2.62E-03 | 25  | 35,437,179       |
| KIAA1377                   | -2.54                 | 1.01E-06 | 2.62E-03 | 5   | 29,559,277       |
| SCARA5                     | -2.68                 | 1.13E-06 | 2.62E-03 | 25  | 29,591,101       |
| GRM5                       | -3.04                 | 1.48E-06 | 2.90E-03 | 21  | 10,982,218       |
| FABP4                      | -3.4                  | 1.57E-06 | 2.90E-03 | X   | 2,439,049        |
| U2                         | 5.65                  | 4.55E-06 | 7.00E-03 | 4   | 12,989,141       |
| CACNA1D                    | -2.74                 | 5.11E-06 | 7.25E-03 | 20  | 36,191,810       |
| MPO                        | 3.69                  | 7.28E-06 | 8.61E-03 | 9   | 32,924,779       |
| GPC3                       | -3.9                  | 7.39E-06 | 8.61E-03 | X   | 104,313,240      |
| HTR4                       | -3.07                 | 7.47E-06 | 8.61E-03 | 4   | 60,275,413       |
| KIF5C                      | -1.93                 | 1.32E-05 | 1.43E-02 | 19  | 50,535,364       |
| ZNF662                     | -2.43                 | 1.52E-05 | 1.55E-02 | 23  | 11,979,368       |
| KIAA1456                   | -2.01                 | 2.52E-05 | 2.27E-02 | 16  | 36,462,321       |
| COL6A6                     | -2.4                  | 2.58E-05 | 2.27E-02 | 23  | 27,759,397       |
| CD300C                     | 1.51                  | 3.06E-05 | 2.57E-02 | 9   | 5,906,878        |
| NAA11                      | 4.07                  | 3.37E-05 | 2.63E-02 | 32  | 3,656,949        |
| APM1                       | -4.1                  | 3.43E-05 | 2.63E-02 | 34  | 19,398,225       |
| RGS13                      | -5.92                 | 4.69E-05 | 3.33E-02 | 38  | 6,288,032        |
| ADAMTS2                    | -1.65                 | 5.48E-05 | 3.74E-02 | 11  | 2,279,935        |

|         |       |          |          |    |             |
|---------|-------|----------|----------|----|-------------|
| ANGPTL5 | -3.1  | 5.73E-05 | 3.78E-02 | 5  | 29,659,261  |
| AFF2    | 3.02  | 6.37E-05 | 4.02E-02 | X  | 116,849,230 |
| PCDH11Y | -2.51 | 6.53E-05 | 4.02E-02 | X  | 68,639,234  |
| MTUS1   | -1.7  | 8.09E-05 | 4.82E-02 | 16 | 40,957,737  |

### 33 Mb risk analysis (shared haplotype)

| Gene Name | logFC <sub>risk</sub> | p-value  | FDR      | Chr | Start first exon |
|-----------|-----------------------|----------|----------|-----|------------------|
| IGLV2-33  | 5.98                  | 5.36E-12 | 9.89E-08 | 26  | 27,164,804       |
| CD5L      | -3.46                 | 3.84E-07 | 3.12E-03 | 7   | 40,515,318       |
| CXCL10    | -3.37                 | 6.55E-07 | 3.12E-03 | 32  | 597,634          |
| SLC25A48  | -4.65                 | 6.76E-07 | 3.12E-03 | 11  | 23,754,003       |
| KRT24     | -5.79                 | 1.76E-06 | 5.50E-03 | 9   | 21,967,227       |
| HIST1H4L  | 2.92                  | 2.62E-06 | 6.91E-03 | 17  | 59,129,682       |
| IGHV3-64  | -3.62                 | 5.29E-06 | 1.14E-02 | 8   | 73,477,706       |
| GPR27     | -3.91                 | 5.57E-06 | 1.14E-02 | 20  | 20,271,644       |
| GZMA      | -2.82                 | 8.06E-06 | 1.31E-02 | 2   | 42,490,492       |
| HS3ST3B1  | 1.96                  | 9.27E-06 | 1.31E-02 | 5   | 38,023,684       |
| CCR6      | 1.04                  | 9.84E-06 | 1.31E-02 | 1   | 54,932,810       |
| KIAA1598  | -3.19                 | 1.14E-05 | 1.35E-02 | 28  | 27,421,247       |
| EXTL1     | -3.45                 | 1.17E-05 | 1.35E-02 | 2   | 73,932,214       |
| PROK2     | -5.98                 | 1.38E-05 | 1.49E-02 | 20  | 20,249,470       |
| KLRK1     | -3                    | 1.69E-05 | 1.65E-02 | 27  | 35,634,936       |
| NPDC1     | -1.08                 | 1.93E-05 | 1.65E-02 | 9   | 48,596,282       |
| OBSL1     | -1.25                 | 1.97E-05 | 1.65E-02 | 37  | 26,048,686       |
| CNNM1     | -8.14                 | 1.98E-05 | 1.65E-02 | 28  | 12,289,827       |
| LBH       | -1.65                 | 2.02E-05 | 1.65E-02 | 17  | 23,944,331       |
| U6        | 1.93                  | 2.51E-05 | 1.65E-02 | 36  | 4,076,401        |
| IGHV3-66  | -5.03                 | 2.65E-05 | 1.65E-02 | 8   | 74,052,039       |

|             |       |          |          |    |             |
|-------------|-------|----------|----------|----|-------------|
| GALNT13     | -9.26 | 2.69E-05 | 1.65E-02 | 36 | 642,898     |
| STOM        | -2    | 2.70E-05 | 1.65E-02 | 11 | 74,270,015  |
| CSF1        | -1.21 | 2.71E-05 | 1.65E-02 | 6  | 42,028,059  |
| MMP25       | -1.69 | 2.72E-05 | 1.65E-02 | 6  | 38,130,092  |
| PTPN22      | 1.07  | 2.74E-05 | 1.65E-02 | 17 | 51,623,693  |
| FAM190A     | -2.26 | 2.77E-05 | 1.65E-02 | 32 | 13,499,039  |
| PADI4       | 2.13  | 3.28E-05 | 1.89E-02 | 2  | 80,912,334  |
| CD8A        | -2.52 | 4.08E-05 | 2.22E-02 | 17 | 38,369,617  |
| RAB19       | -3.33 | 4.44E-05 | 2.34E-02 | 16 | 8,544,349   |
| DLGAP3      | 2.95  | 5.69E-05 | 2.92E-02 | 15 | 7,058,384   |
| EOMES       | -2.56 | 6.02E-05 | 2.97E-02 | 23 | 16,505,623  |
| MAPK11      | -2.93 | 6.13E-05 | 2.97E-02 | 10 | 16,977,036  |
| CCL22       | -2.66 | 6.27E-05 | 2.97E-02 | 2  | 59,039,616  |
| TMEM178     | -3.12 | 6.73E-05 | 3.05E-02 | 17 | 31,633,521  |
| HIST1H2AJ   | 1.14  | 6.77E-05 | 3.05E-02 | 35 | 24,155,213  |
| CCDC168     | 1.98  | 7.45E-05 | 3.27E-02 | 22 | 52,228,513  |
| TARM1       | -2.44 | 8.11E-05 | 3.41E-02 | 1  | 103,180,872 |
| NPTX2       | -2.72 | 8.13E-05 | 3.41E-02 | 6  | 10,805,532  |
| GZMK        | -2.47 | 8.82E-05 | 3.44E-02 | 4  | 60,559,232  |
| AFF2        | -3.94 | 9.45E-05 | 3.44E-02 | X  | 116,849,230 |
| TRBV20OR9-2 | -1.93 | 9.51E-05 | 3.44E-02 | 16 | 6,769,873   |
| CD151       | -0.92 | 1.01E-04 | 3.44E-02 | 18 | 45,195,481  |
| TNFAIP3     | -1.1  | 1.02E-04 | 3.44E-02 | 1  | 30,247,095  |
| IGHV3-53    | -2.92 | 1.05E-04 | 3.44E-02 |    | unmapped    |
| GZMB        | -3.01 | 1.09E-04 | 3.44E-02 | 8  | 4,508,717   |
| ACTL7A      | -1.84 | 1.10E-04 | 3.44E-02 | 11 | 64,032,466  |
| PLEKHG5     | -1.5  | 1.12E-04 | 3.44E-02 | 5  | 60,320,850  |
| IGLV1-50    | -3.79 | 1.13E-04 | 3.44E-02 | 26 | 26,151,663  |
| C17orf104   | -3.1  | 1.15E-04 | 3.44E-02 | 9  | 18,795,120  |

|          |       |          |          |    |             |
|----------|-------|----------|----------|----|-------------|
| FBXO11   | 1.67  | 1.16E-04 | 3.44E-02 | 10 | 49,839,202  |
| MARCKSL1 | -1.5  | 1.19E-04 | 3.44E-02 | 2  | 68,898,513  |
| NKG7     | -2.4  | 1.22E-04 | 3.44E-02 | 1  | 105,608,388 |
| SMOC1    | -3.07 | 1.22E-04 | 3.44E-02 | 8  | 43,608,321  |
| ROR2     | -3.32 | 1.25E-04 | 3.44E-02 | 1  | 95,235,633  |
| CHRM4    | -2.6  | 1.31E-04 | 3.44E-02 | 18 | 43,082,404  |
| SCN2A    | 3.88  | 1.32E-04 | 3.44E-02 | 36 | 10,517,618  |
| TBXA2R   | -2.6  | 1.32E-04 | 3.44E-02 | 20 | 55,824,410  |
| CCL5     | -2.36 | 1.32E-04 | 3.44E-02 | 9  | 37,817,391  |
| CCL19    | -1.7  | 1.34E-04 | 3.44E-02 | 11 | 51,357,399  |
| PIP5K1B  | 2.13  | 1.35E-04 | 3.44E-02 | 1  | 88,359,159  |
| MT1      | -2.19 | 1.36E-04 | 3.44E-02 | 2  | 59,602,961  |
| IGLV3-9  | -3.37 | 1.36E-04 | 3.44E-02 | 26 | 27,391,907  |
| CORO6    | -1.28 | 1.44E-04 | 3.58E-02 | 9  | 43,711,845  |
| TLR10    | 0.87  | 1.66E-04 | 4.02E-02 | 3  | 73,568,321  |
| TNIK     | -1.81 | 1.68E-04 | 4.02E-02 | 34 | 35,427,908  |
| PTH1R    | -2.15 | 1.72E-04 | 4.06E-02 | 20 | 41,901,764  |
| CHGA     | -1.67 | 1.74E-04 | 4.06E-02 | 8  | 1,962,944   |
| SLC38A11 | 1.83  | 1.83E-04 | 4.22E-02 | 36 | 10,118,571  |
| COL17A1  | -2.06 | 1.90E-04 | 4.29E-02 | 28 | 16,350,689  |
| KEL      | -1.43 | 1.92E-04 | 4.29E-02 | 16 | 6,626,235   |
| CD8B     | -2.13 | 1.93E-04 | 4.29E-02 | 17 | 38,342,989  |
| TMPRSS13 | 3.53  | 1.98E-04 | 4.34E-02 | 5  | 15,725,911  |
| TNFRSF21 | -1.09 | 2.03E-04 | 4.37E-02 | 12 | 15,348,061  |
| GSTA4    | -1.02 | 2.05E-04 | 4.37E-02 | 12 | 20,426,726  |
| TNFRSF4  | -2.32 | 2.10E-04 | 4.37E-02 | 5  | 56,401,401  |
| GRHL3    | -3.47 | 2.10E-04 | 4.37E-02 | 2  | 75,290,529  |
| ZAP70    | -1.81 | 2.12E-04 | 4.37E-02 | 10 | 44,887,358  |
| LAD1     | -2.65 | 2.17E-04 | 4.37E-02 | 7  | 1,623,723   |

|          |       |          |          |    |            |
|----------|-------|----------|----------|----|------------|
| CDYL     | 0.81  | 2.18E-04 | 4.37E-02 | 35 | 4,844,693  |
| RGS10    | -1.57 | 2.20E-04 | 4.37E-02 | 28 | 29,708,434 |
| LCK      | -1.43 | 2.22E-04 | 4.37E-02 | 2  | 68,938,292 |
| TRBV28   | -2.52 | 2.22E-04 | 4.37E-02 | 16 | 6,869,037  |
| ABCA4    | -2.43 | 2.36E-04 | 4.48E-02 | 6  | 55,058,361 |
| IL4R     | -0.96 | 2.37E-04 | 4.48E-02 | 6  | 19,253,631 |
| AASS     | -2.69 | 2.37E-04 | 4.48E-02 | 14 | 59,948,143 |
| CXCR3    | 1.72  | 2.39E-04 | 4.48E-02 | X  | 55,882,433 |
| GNGT2    | 0.73  | 2.45E-04 | 4.48E-02 | 9  | 25,369,751 |
| PRF1     | -2.27 | 2.48E-04 | 4.48E-02 | 4  | 21,497,537 |
| IGLV1-50 | -3.53 | 2.53E-04 | 4.48E-02 | 26 | 25,571,077 |
| HTRA1    | -1.21 | 2.57E-04 | 4.48E-02 | 28 | 32,131,715 |
| TNFRSF18 | -1.72 | 2.58E-04 | 4.48E-02 | 5  | 56,394,294 |
| MFAP3    | 0.7   | 2.61E-04 | 4.48E-02 | 4  | 55,609,790 |
| FLT3     | -1.86 | 2.62E-04 | 4.48E-02 | 25 | 11,594,146 |
| PTPRE    | -1.26 | 2.78E-04 | 4.66E-02 | 28 | 36,746,822 |
| LY49     | -3.13 | 2.79E-04 | 4.66E-02 | 27 | 35,144,651 |
| RUNX2    | -1.58 | 2.80E-04 | 4.66E-02 | 12 | 13,786,142 |
| LAT      | -1.95 | 2.94E-04 | 4.77E-02 | 6  | 18,458,571 |
| OSBP2    | -2.8  | 2.97E-04 | 4.77E-02 | 26 | 23,761,633 |
| IL2RB    | -1.59 | 2.97E-04 | 4.77E-02 | 10 | 27,370,669 |
