# Supplementary material for: Genome-wide Association Study Identifies Shared Risk Loci Common to Two Malignancies in Golden Retrievers
Source: PubMed Central journal article supplement (PMC4333733; doi:10.1371/journal.pgen.1004922), 2015-02-02
Supplement: pgen.1004922.s011.pdf [file pgen.1004922.s011.pdf]

**Supplementary Table 7. Significantly affected biological functions downstream of the observed gene expression changes by the 33 Mb risk haplotype**

| Functions Annotation                 | # Molecules | Predicted Activation State | Activation z-score | B-H corrected p-value | Notes | Molecules                                                                                                                                                 |
|--------------------------------------|-------------|----------------------------|--------------------|-----------------------|-------|-----------------------------------------------------------------------------------------------------------------------------------------------------------|
| quantity of T lymphocytes            | 19          | Decreased                  | -2.618             | 1.46E-08              | bias  | CCL19,CCL5,CCR6,CD5L,CD8A,CD8B,CSF1,CXCL10,CXCR3,FLT3,IL2RB,LAT,LCK,PRF1,PTPN22,RUNX2,TNFRSF21,TNFRSF4,ZAP70                                              |
| quantity of mononuclear leukocytes   | 21          | Decreased                  | -2.897             | 2.96E-08              | bias  | CCL19,CCL5,CCR6,CD5L,CD8A,CD8B,CSF1,CXCL10,CXCR3,FLT3,IL2RB,LAT,LCK,PRF1,PROK2,PTPN22,RUNX2,TNFAIP3,TNFRSF21,TNFRSF4,ZAP70                                |
| activation of cells                  | 24          | Decreased                  | -3.553             | 3.72E-08              | bias  | CCL22,CCL5,CCR6,CD8A,CHGA,CSF1,CXCL10,FLT3,GZMA,GZMB,IL2RB,KLRC4-KLRK1/KLRK1,LAT,LCK,PRF1,PTH1R,PTPN22,PTPRE,RUNX2,TBXA2R,TNFRSF18,TNFRSF21,TNFRSF4,ZAP70 |
| activation of T lymphocytes          | 15          | Decreased                  | -3.070             | 3.72E-08              | bias  | CCL22,CCL5,CD8A,CXCL10,GZMA,IL2RB,KLRC4-KLRK1/KLRK1,LAT,LCK,PRF1,PTPN22,TNFRSF18,TNFRSF21,TNFRSF4,ZAP70                                                   |
| quantity of lymphocytes              | 20          | Decreased                  | -2.727             | 3.72E-08              | bias  | CCL19,CCL5,CCR6,CD5L,CD8A,CD8B,CSF1,CXCL10,CXCR3,FLT3,IL2RB,LAT,LCK,PRF1,PTPN22,RUNX2,TNFAIP3,TNFRSF21,TNFRSF4,ZAP70                                      |
| quantity of leukocytes               | 23          | Decreased                  | -2.494             | 3.72E-08              |       | CCL19,CCL22,CCL5,CCR6,CD5L,CD8A,CD8B,CSF1,CXCL10,CXCR3,FLT3,IL2RB,LAT,LCK,PRF1,PROK2,PTPN22,RGS10,RUNX2,TNFAIP3,TNFRSF21,TNFRSF4,ZAP70                    |
| quantity of blood cells              | 24          | Decreased                  | -2.468             | 3.72E-08              |       | CCL19,CCL22,CCL5,CCR6,CD5L,CD8A,CD8B,CSF1,CXCL10,CXCR3,FLT3,IL2RB,LAT,LCK,PRF1,PROK2,PTH1R,PTPN22,RGS10,RUNX2,TNFAIP3,TNFRSF21,TNFRSF4,ZAP70              |
| activation of mononuclear leukocytes | 17          | Decreased                  | -3.313             | 4.20E-08              | bias  | CCL22,CCL5,CD8A,CSF1,CXCL10,FLT3,GZMA,IL2RB,KLRC4-KLRK1/KLRK1,LAT,LCK,PRF1,PTPN22,TNFRSF18,TNFRSF21,TNFRSF4,ZAP70                                         |
| activation of leukocytes             | 20          | Decreased                  | -3.709             | 5.79E-08              | bias  | CCL22,CCL5,CD8A,CHGA,CSF1,CXCL10,FLT3,GZMA,IL2RB,KLRC4-KLRK1/KLRK1,LAT,LCK,PRF1,PTPN22,PTPRE,TBXA2R,TNFRSF18,TNFRSF21,TNFRSF4,ZAP70                       |

|                                                 |    |           |        |          |      |                                                                                                                                                                                                                          |
|-------------------------------------------------|----|-----------|--------|----------|------|--------------------------------------------------------------------------------------------------------------------------------------------------------------------------------------------------------------------------|
| cell movement                                   | 33 | Decreased | -2.067 | 1.38E-07 | bias | CCL19,CCL22,CCL5,CCR6,CD8A,CHGA,CHRM4,COL17A1,CSF1,CXCL10,CXCR3,EOMES,GZMB,HTRA1,IL2RB,KLRC4-KLRK1/KLRK1,LAT,LCK,MAPK11,MARCKSL1,NPTX2,PLEKHG5,PRF1,PROK2,PTH1R,RGS10,ROR2,RUNX2,TNFAIP3,TNFRSF18,TNFRSF21,TNFRSF4,ZAP70 |
| activation of lymphocytes                       | 16 | Decreased | -3.163 | 1.43E-07 | bias | CCL22,CCL5,CD8A,CXCL10,FLT3,GZMA,IL2RB,KLRC4-KLRK1/KLRK1,LAT,LCK,PRF1,PTPN22,TNFRSF18,TNFRSF21,TNFRSF4,ZAP70                                                                                                             |
| migration of cells                              | 31 | Decreased | -2.366 | 1.78E-07 | bias | CCL19,CCL22,CCL5,CCR6,CD8A,CHGA,CHRM4,COL17A1,CSF1,CXCL10,CXCR3,EOMES,GZMB,IL2RB,KLRC4-KLRK1/KLRK1,LAT,LCK,MAPK11,MARCKSL1,NPTX2,PLEKHG5,PRF1,PROK2,PTH1R,ROR2,RUNX2,TNFAIP3,TNFRSF18,TNFRSF21,TNFRSF4,ZAP70             |
| mobilization of Ca <sup>2+</sup>                | 13 | Decreased | -2.131 | 1.85E-06 | bias | CCL19,CCL22,CCL5,CCR6,CD8A,CXCL10,CXCR3,KLRC4-KLRK1/KLRK1,LAT,LCK,PROK2,TBXA2R,ZAP70                                                                                                                                     |
| cell movement of leukemia cell lines            | 8  | Decreased | -2.020 | 4.30E-06 | bias | CCL19,CCL22,CCL5,CSF1,CXCL10,KLRC4-KLRK1/KLRK1,LCK,MAPK11                                                                                                                                                                |
| cell movement of leukocyte cell lines           | 7  | Decreased | -2.410 | 5.51E-06 | bias | CCL19,CCL22,CCL5,CSF1,CXCR3,LCK,ZAP70                                                                                                                                                                                    |
| quantity of cells                               | 26 | Decreased | -2.833 | 8.18E-06 |      | ABCA4,CCL19,CCL22,CCL5,CCR6,CD5L,CD8A,CD8B,CSF1,CXCL10,CXCR3,FLT3,IL2RB,LAT,LCK,PRF1,PROK2,PTH1R,PTPN22,RGS10,ROR2,RUNX2,TNFAIP3,TNFRSF21,TNFRSF4,ZAP70                                                                  |
| stimulation of cells                            | 11 | Decreased | -2.340 | 1.70E-05 | bias | CCL22,CCL5,CD8A,CSF1,CXCL10,IL2RB,KLRC4-KLRK1/KLRK1,LCK,RUNX2,TNFAIP3,TNFRSF18                                                                                                                                           |
| quantity of Ca <sup>2+</sup>                    | 13 | Decreased | -2.777 | 2.14E-05 | bias | CCL19,CCL22,CCL5,CD8A,CHGA,CSF1,CXCL10,CXCR3,LAT,LCK,MARCKSL1,PTH1R,TBXA2R                                                                                                                                               |
| cell movement of hematopoietic progenitor cells | 6  | Decreased | -2.169 | 2.29E-05 | bias | CCL19,CCL22,CCL5,CXCL10,CXCR3,ZAP70                                                                                                                                                                                      |
| quantity of thymocytes                          | 9  | Decreased | -2.397 | 2.48E-05 | bias | CCR6,CD5L,CD8A,CD8B,IL2RB,LAT,LCK,RUNX2,ZAP70                                                                                                                                                                            |
| quantity of hematopoietic progenitor cells      | 12 | Decreased | -2.613 | 3.12E-05 |      | CCR6,CD5L,CD8A,CD8B,CSF1,FLT3,IL2RB,LAT,LCK,PTH1R,RUNX2,ZAP70                                                                                                                                                            |

|                                                   |    |           |        |          |      |                                                                                                                                                       |
|---------------------------------------------------|----|-----------|--------|----------|------|-------------------------------------------------------------------------------------------------------------------------------------------------------|
| development of mononuclear leukocytes             | 13 | Decreased | -2.042 | 6.76E-05 | bias | CD8A,CD8B,CSF1,EOMES,FLT3,IL2RB,LAT,LCK,PTPN22,RUNX2,TNFAIP3,TNFRSF4,ZAP70                                                                            |
| cytotoxicity of lymphocytes                       | 7  | Decreased | -2.367 | 1.27E-04 | bias | CCL5,GZMA,GZMB,KLRC4-KLRK1/KLRK1,LAT,LCK,PRF1                                                                                                         |
| chemotaxis of leukemia cell lines                 | 5  | Decreased | -2.191 | 1.45E-04 | bias | CCL19,CCL22,CCL5,CSF1,LCK                                                                                                                             |
| metabolism of reactive oxygen species             | 13 | Decreased | -2.950 | 1.61E-04 |      | CCL5,CSF1,FLT3,GSTA4,GZMA,GZMB,GZMK,LAT,LCK,MAPK11,PRF1,TBXA2R,ZAP70                                                                                  |
| recruitment of antigen presenting cells           | 6  | Decreased | -2.191 | 1.66E-04 | bias | CCL19,CCL22,CCL5,CD8A,CSF1,CXCL10                                                                                                                     |
| cytotoxicity of cells                             | 8  | Decreased | -2.242 | 1.73E-04 | bias | CCL5,GZMA,GZMB,KLRC4-KLRK1/KLRK1,LAT,LCK,PRF1,TNFAIP3                                                                                                 |
| polarization of blood cells                       | 6  | Decreased | -2.429 | 1.81E-04 | bias | CCL19,CCL22,CCL5,CSF1,CXCL10,LCK                                                                                                                      |
| differentiation of cells                          | 26 | Decreased | -2.148 | 1.99E-04 |      | CCL19,CCL5,CD8A,CD8B,CSF1,CXCL10,EOMES,EXTL1,FLT3,GRHL3,GZMB,HTRA1,IL2RB,LAT,LBH,LCK,MAPK11,PTH1R,PTPN22,PTPRE,RGS10,ROR2,RUNX2,TNFAIP3,TNFRSF4,ZAP70 |
| differentiation of hematopoietic progenitor cells | 8  | Decreased | -2.015 | 2.25E-04 | bias | CD8B,CSF1,EXTL1,FLT3,LAT,LCK,RUNX2,ZAP70                                                                                                              |
| cell viability                                    | 19 | Decreased | -2.173 | 3.57E-04 | bias | CCL5,CD8A,COL17A1,CSF1,CXCL10,CXCR3,FLT3,IL2RB,LAT,LCK,MAPK11,PROK2,PTH1R,PTPN22,PTPRE,ROR2,TNFAIP3,TNFRSF18,TNFRSF4                                  |
| synthesis of reactive oxygen species              | 12 | Decreased | -2.801 | 4.42E-04 |      | CCL5,CSF1,FLT3,GZMA,GZMB,GZMK,LAT,LCK,MAPK11,PRF1,TBXA2R,ZAP70                                                                                        |
| tyrosine phosphorylation of protein               | 7  | Decreased | -2.445 | 4.99E-04 | bias | CCL5,CD8A,CD8B,CSF1,LCK,PTPN22,ZAP70                                                                                                                  |
| length of long bones                              | 4  | Decreased | -2.000 | 7.76E-04 | bias | CSF1,PTH1R,ROR2,RUNX2                                                                                                                                 |

|                                       |    |           |        |          |      |                                                                            |
|---------------------------------------|----|-----------|--------|----------|------|----------------------------------------------------------------------------|
| maturation of cells                   | 10 | Decreased | -2.122 | 8.82E-04 | bias | CCL19,CCL5,CD5L,CSF1,EOMES,FLT3,LAT,LCK,PTH1R,RUNX2                        |
| polarization of leukocytes            | 5  | Decreased | -2.224 | 1.40E-03 | bias | CCL19,CCL22,CCL5,CSF1,LCK                                                  |
| infection of mammalia                 | 8  | Increased | 2.019  | 2.02E-03 | bias | CCR6,CD5L,CD8A,CXCL10,CXCR3,GZMA,PADI4,PRF1                                |
| production of reactive oxygen species | 9  | Decreased | -2.953 | 2.83E-03 |      | CCL5,CSF1,FLT3,GZMA,GZMB,GZMK,LAT,PRF1,ZAP70                               |
| activation of myeloid cells           | 8  | Decreased | -2.558 | 2.97E-03 | bias | CCL22,CCL5,CHGA,CSF1,CXCL10,GZMA,PTPRE,TBXA2R                              |
| activation of phagocytes              | 8  | Decreased | -2.559 | 4.07E-03 | bias | CCL22,CCL5,CHGA,CSF1,CXCL10,GZMA,PTPRE,TBXA2R                              |
| release of Ca <sup>2+</sup>           | 6  | Decreased | -2.000 | 5.16E-03 | bias | CCL19,CCL5,CHGA,CSF1,LCK,ZAP70                                             |
| maturation of leukocytes              | 6  | Decreased | -2.404 | 6.60E-03 | bias | CCL19,CCL5,CSF1,EOMES,LAT,LCK                                              |
| phosphorylation of protein            | 10 | Decreased | -2.445 | 1.03E-02 | bias | CCL5,CD8A,CD8B,CSF1,FLT3,LCK,MAPK11,PTPN22,TNIK,ZAP70                      |
| cell movement of tumor cell lines     | 11 | Decreased | -2.292 | 1.13E-02 | bias | CCL19,CCL22,CCL5,CSF1,CXCL10,GZMB,HTRA1,KLRC4-KLRK1/KLRK1,LCK,MAPK11,RUNX2 |
| proliferation of leukocyte cell lines | 5  | Decreased | -2.067 | 1.16E-02 | bias | CD8A,CSF1,FLT3,IL2RB,LCK                                                   |
