# Supplementary material for: Genome-wide Association Study Identifies Shared Risk Loci Common to Two Malignancies in Golden Retrievers
Source: PubMed Central journal article supplement (PMC4333733; doi:10.1371/journal.pgen.1004922), 2015-02-02
Supplement: pgen.1004922.s012.pdf [file pgen.1004922.s012.pdf]

**Supplementary Table 8. Canonical pathways with significant ( $p < 0.05$ ) enrichment of the genes with expression changes by the 33 Mb risk haplotype**

| Ingenuity Canonical Pathways                               | B-H p-value | Ratio | Molecules                       |
|------------------------------------------------------------|-------------|-------|---------------------------------|
| CTLA4 Signaling in Cytotoxic T Lymphocytes                 | 1.58E-04    | 0.07  | LCK,LAT,ZAP70,CD8A,CD8B,PTPN22  |
| Pathogenesis of Multiple Sclerosis                         | 3.39E-04    | 0.33  | CXCL10,CXCR3,CCL5               |
| T Cell Receptor Signaling                                  | 2.24E-03    | 0.05  | LCK,LAT,ZAP70,CD8A,CD8B         |
| IL-17A Signaling in Gastric Cells                          | 4.47E-03    | 0.12  | CXCL10,CCL5,MAPK11              |
| Communication between Innate and Adaptive Immune Cells     | 0.01        | 0.04  | CXCL10,CCL5,CD8A,CD8B           |
| Granulocyte Adhesion and Diapedesis                        | 0.01        | 0.03  | CXCL10,CCL22,CCL5,MMP25,CCL19   |
| Agranulocyte Adhesion and Diapedesis                       | 0.01        | 0.03  | CXCL10,CCL22,CCL5,MMP25,CCL19   |
| iCOS-iCOSL Signaling in T Helper Cells                     | 0.01        | 0.04  | LCK,LAT,ZAP70,IL2RB             |
| Natural Killer Cell Signaling                              | 0.01        | 0.03  | LCK,KLRC4-KLRK1/KLRK1,LAT,ZAP70 |
| Hematopoiesis from Pluripotent Stem Cells                  | 0.01        | 0.06  | CSF1,CD8A,CD8B                  |
| Primary Immunodeficiency Signaling                         | 0.01        | 0.06  | LCK,ZAP70,CD8A                  |
| Granzyme B Signaling                                       | 0.02        | 0.13  | PRF1,GZMB                       |
| IL-15 Signaling                                            | 0.03        | 0.04  | LCK,MAPK11,IL2RB                |
| Role of MAPK Signaling in the Pathogenesis of Influenza    | 0.03        | 0.04  | CXCL10,CCL5,MAPK11              |
| Granzyme A Signaling                                       | 0.03        | 0.10  | GZMA,PRF1                       |
| VDR/RXR Activation                                         | 0.03        | 0.04  | CXCL10,RUNX2,CCL5               |
| Tumoricidal Function of Hepatic Natural Killer Cells       | 0.03        | 0.08  | PRF1,GZMB                       |
| Crosstalk between Dendritic Cells and Natural Killer Cells | 0.04        | 0.03  | PRF1,KLRC4-KLRK1/KLRK1,IL2RB    |
