# Supplementary material for: Genome-wide Association Study Identifies Shared Risk Loci Common to Two Malignancies in Golden Retrievers
Source: PubMed Central journal article supplement (PMC4333733; doi:10.1371/journal.pgen.1004922), 2015-02-02
Supplement: pgen.1004922.s013.pdf [file pgen.1004922.s013.pdf]

**Supplementary Table 9. Upstream regulators of the observed gene expression changes by the 33 Mb risk haplotype**

| Upstream Regulator                            | Molecule Type           | Predicted Activation State | Activation z-score | p-value of overlap (Fisher's exact) | Notes | Target molecules in dataset                                                                                             |
|-----------------------------------------------|-------------------------|----------------------------|--------------------|-------------------------------------|-------|-------------------------------------------------------------------------------------------------------------------------|
| IL2                                           | cytokine                | Inhibited                  | -2.967             | 5.62E-14                            | bias  | CCL5,CCR6,CD8A,CSF1,CXCL10,CXCR3,EOMES,GZMA,GZMB,IL2RB,KLRC4-KLRK1/KLRK1,LCK,MMP25,PRF1,PROK2,TNFRSF18,TNFRSF21,TNFRSF4 |
| CD3                                           | complex                 | Activated                  | 2.022              | 3.34E-13                            | bias  | CCL22,CCL5,CCR6,CD8A,CD8B,CXCL10,CXCR3,EOMES,GZMA,GZMB,GZMK,IL2RB,LCK,PRF1,PTPN22,STOM,TNFAIP3,TNFRSF18,TNFRSF4         |
| TCR                                           | complex                 | Inhibited                  | -2.833             | 6.31E-13                            | bias  | CCL22,CCL5,CCR6,CD8B,CXCL10,CXCR3,GZMA,GZMB,LAT,LCK,PRF1,TNFRSF18,TNFRSF4,ZAP70                                         |
| ZBTB7B                                        | transcription regulator | Activated                  | 2.207              | 1.13E-09                            |       | CCR6,CD8A,CD8B,EOMES,IL2RB,PRF1                                                                                         |
| IL15                                          | cytokine                | Inhibited                  | -2.632             | 2.96E-09                            | bias  | CCL19,CCL5,CD8A,CD8B,CSF1,CXCL10,GZMB,GZMK,IL2RB,KLRC4-KLRK1/KLRK1,LCK,PRF1                                             |
| CD40LG                                        | cytokine                | Inhibited                  | -2.209             | 8.31E-08                            | bias  | CCL19,CCL22,CCL5,CD8A,CSF1,CXCL10,CXCR3,GZMB,MARCKSL1,TNFAIP3,ZAP70                                                     |
| NFKB1                                         | transcription regulator | Inhibited                  | -2.2               | 1.03E-05                            | bias  | CCL19,CCL22,CCL5,CSF1,CXCL10,TNFAIP3,TNFRSF4                                                                            |
| miR-1237-3p (and other miRNAs w/seed CCUUCUG) | mature microRNA         | Activated                  | 3.09               | 4.52E-05                            | bias  | ABCA4,CCL19,CNNM1,CORO6,EOMES,IL2RB,OBSL1,PROK2,RUNX2,TNIK                                                              |
| IL18                                          | cytokine                | Inhibited                  | -2.219             | 9.82E-05                            | bias  | CCL5,CSF1,CXCL10,KLRC4-KLRK1/KLRK1,PRF1                                                                                 |
| CBFB                                          | transcription regulator | Activated                  | 2                  | 9.85E-05                            |       | CCR6,IL2RB,TNFRSF18,TNFRSF4                                                                                             |
| miR-382-5p (miRNAs w/seed AAGUUGU)            | mature microRNA         | Activated                  | 2.177              | 1.52E-04                            | bias  | AFF2,GALNT13,HS3ST3B1,KIAA1598,KRT24,LAD1,MARCKSL1,SMOC1                                                                |
| TNF                                           | cytokine                | Inhibited                  | -2.213             | 1.97E-04                            | bias  | CCL19,CCL22,CCL5,CCR6,CSF1,CXCL10,CXCR3,LAD1,MARCKSL1,PROK2,RUNX2,TNFAIP3,TNFRSF18,TNFRSF21,TNFRSF4                     |

|                                               |                         |           |        |          |      |                                                                                                                           |
|-----------------------------------------------|-------------------------|-----------|--------|----------|------|---------------------------------------------------------------------------------------------------------------------------|
| GLI1                                          | transcription regulator | Inhibited | -2.219 | 4.39E-04 | bias | MAPK11,NPDC1,PTH1R,RGS10,RUNX2                                                                                            |
| miR-4648 (miRNAs w/seed GUGGGAC)              | mature microRNA         | Activated | 2.17   | 5.96E-04 | bias | AFF2,CCL22,KLRC4-KLRK1/KLRK1,MMP25,NKG7,OBSL1,PLEKHG5,PTPRE,SCN2A                                                         |
| RELA                                          | transcription regulator |           | -2     | 1.16E-03 | bias | CCL19,CCL22,CCL5,CXCL10,TNFAIP3,TNFRSF4                                                                                   |
| IKKBK                                         | kinase                  | Inhibited | -2.194 | 1.52E-03 | bias | CCL19,CCL5,CSF1,CXCL10,TNFRSF4                                                                                            |
| miR-486-3p (and other miRNAs w/seed GGGCAG)   | mature microRNA         | Activated | 2.814  | 2.03E-03 | bias | CCSER1,CD5L,CORO6,CSF1,CXCR3,GALNT13,IL2RB,KLRC4-KLRK1/KLRK1,MARCKSL1,NPTX2,OSBP2,PLEKHG5,SMOC1,TMEM178A,TMPRSS13,TNFRSF4 |
| miR-3151-5p (miRNAs w/seed GUGGGGC)           | mature microRNA         | Activated | 2.408  | 2.41E-03 | bias | CCL22,CCSER1,CHGA,CNNM1,CXCR3,FLT3,HTRA1,IL2RB,NPTX2,OSBP2,PIP5K1B,SMOC1,ZAP70                                            |
| miR-3678-3p (miRNAs w/seed UGCAGAG)           | mature microRNA         | Activated | 2.759  | 2.70E-03 | bias | CCL22,CD5L,CORO6,CXCL10,IL2RB,LCK,PTPRE,TNIK                                                                              |
| miR-1908-5p (and other miRNAs w/seed GGCGGGG) | mature microRNA         | Activated | 3.248  | 2.79E-03 | bias | CCL22,CD5L,CD8A,CORO6,CSF1,EXTL1,MMP25,NPTX2,PLEKHG5,ROR2,TNFRSF4                                                         |
| miR-519a-3p (and other miRNAs w/seed AAGUGCA) | mature microRNA         | Activated | 2.8    | 2.87E-03 | bias | CSF1,GALNT13,GZMK,KIAA1598,SLC25A48,SMOC1,STOM,TNFRSF21                                                                   |
| miR-3978 (miRNAs w/seed UGGAAAG)              | mature microRNA         | Activated | 2.425  | 4.43E-03 | bias | LBH,OSBP2,PROK2,RUNX2,STOM,TNFAIP3                                                                                        |
| miR-125b-5p (and other miRNAs w/seed CCCUGAG) | mature microRNA         | Activated | 2.266  | 5.91E-03 | bias | CD5L,CD8A,CNNM1,HIST1H4L,IL2RB,KIAA1598,LBH,MMP25,PRF1,PTH1R,TMPRSS13,TNFAIP3                                             |
| miR-4300 (and other miRNAs w/seed GGGAGCU)    | mature microRNA         | Activated | 3.162  | 7.21E-03 | bias | CCL22,CD8B,EXTL1,GALNT13,IL2RB,LAD1,NPTX2,OSBP2,TBXA2R,TNFRSF21                                                           |
| miR-4802-3p (and other miRNAs w/seed ACAUGGA) | mature microRNA         | Activated | 2.619  | 8.66E-03 | bias | CCSER1,CD5L,KIAA1598,MMP25,PTPRE,ROR2,STOM                                                                                |

|                                                     |                    |           |       |          |      |                                                                            |
|-----------------------------------------------------|--------------------|-----------|-------|----------|------|----------------------------------------------------------------------------|
| miR-1225-3p<br>(miRNAs w/seed<br>GAGCCCC)           | mature<br>microRNA | Activated | 3.092 | 9.40E-03 | bias | CCL22,CD5L,CD8B,CORO6,IL2RB,LAT,MMP25,NPTX2,OSBP2,ROR2                     |
| miR-1237-5p (and<br>other miRNAs w/seed<br>GGGGGCG) | mature<br>microRNA | Activated | 3.405 | 1.27E-02 | bias | CD5L,CD8B,CHGA,CORO6,EXTL1,IL2RB,KIAA1598,MMP25,NPTX2,OBSL1,OSBP2,PTPRE    |
| miR-423-5p (and<br>other miRNAs w/seed<br>GAGGGGC)  | mature<br>microRNA | Activated | 2.892 | 1.60E-02 | bias | ACTL7A,CCL22,CCL5,CD8A,CSF1,DLGAP3,LAD1,NKG7,NPTX2,OBSL1,OSBP2,TBXA2R      |
| miR-935 (miRNAs<br>w/seed CAGUUAC)                  | mature<br>microRNA | Activated | 2.219 | 1.62E-02 | bias | C17orf104,EOMES,GALNT13,IL2RB,PROK2                                        |
| miR-3090-3p (and<br>other miRNAs w/seed<br>CCCAGGU) | mature<br>microRNA | Activated | 2.401 | 1.88E-02 | bias | C17orf104,CCL19,CCL22,CD8A,CORO6,LAT,MMP25,OSBP2,STOM,TMPRSS13             |
| miR-1915-3p (and<br>other miRNAs w/seed<br>CCCAGGG) | mature<br>microRNA | Activated | 2.761 | 2.03E-02 | bias | CCL22,CCR6,CD8A,IL2RB,LAD1,LAT,LCK,MMP25,NPDC1,NPTX2,OBSL1,SMOC1           |
| miR-1247-5p<br>(miRNAs w/seed<br>CCGUCC)            | mature<br>microRNA | Activated | 2.2   | 2.07E-02 | bias | CD8A,LBH,NPTX2,TNFRSF18,TNFRSF4                                            |
| miR-3656 (and other<br>miRNAs w/seed<br>GCGGGUG)    | mature<br>microRNA | Activated | 2.2   | 2.25E-02 | bias | CCL5,CD8A,CSF1,EXTL1,MMP25                                                 |
| miR-663b (miRNAs<br>w/seed GUGGCC)                  | mature<br>microRNA | Activated | 2.373 | 2.43E-02 | bias | AASS,CNNM1,GALNT13,HIST1H4L,KLRC4-KLRK1/KLRK1,MMP25,PLEKHG5,RUNX2,TNFRSF21 |
| miR-1285-3p (and<br>other miRNAs w/seed<br>CUGGGCA) | mature<br>microRNA | Activated | 3.251 | 2.44E-02 | bias | CCL22,CD8A,CNNM1,LAD1,MAPK11,MARCKSL1,NPTX2,PLEKHG5,RUNX2,STOM,TNFRSF21    |
| miR-204-5p (and<br>other miRNAs w/seed<br>UCCUUU)   | mature<br>microRNA | Activated | 2.124 | 2.46E-02 | bias | CCSER1,CD8B,COL17A1,FLT3,ROR2,RUNX2,SCN2A,SMOC1,TNFAIP3                    |
| miR-4260 (and other<br>miRNAs w/seed<br>UUGGGGC)    | mature<br>microRNA | Activated | 2.582 | 2.46E-02 | bias | AFF2,CCL22,CD5L,GALNT13,NPTX2,OSBP2,SMOC1                                  |

|                                                     |                    |           |       |          |      |                                                                           |
|-----------------------------------------------------|--------------------|-----------|-------|----------|------|---------------------------------------------------------------------------|
| miR-4536-5p<br>(miRNAs w/seed<br>GUGGUAG)           | mature<br>microRNA | Activated | 2.183 | 2.73E-02 | bias | CCL22,CCL5,KIAA1598,STOM,TNIK                                             |
| miR-4537 (miRNAs<br>w/seed GAGCCGA)                 | mature<br>microRNA | Activated | 2.194 | 2.88E-02 | bias | AASS,CSF1,LAD1,PLEKHG5,STOM                                               |
| miR-4751 (miRNAs<br>w/seed GAGGACC)                 | mature<br>microRNA | Activated | 2.401 | 2.99E-02 | bias | EXTL1,GALNT13,IL2RB,LAT,MAPK11,RUNX2                                      |
| miR-711 (miRNAs<br>w/seed GGACCCA)                  | mature<br>microRNA | Activated | 2.587 | 3.26E-02 | bias | AFF2,CD8B,CNNM1,GSTA4,GZMK,KLRC4-KLRK1/KLRK1,TBXA2R                       |
| miR-331-3p (miRNAs<br>w/seed CCCUGG)                | mature<br>microRNA | Activated | 2.155 | 4.02E-02 | bias | CCSER1,CNNM1,EOMES,GALNT13,KLRC4-<br>KLRK1/KLRK1,LAD1,LBH,MAPK11,TMPRSS13 |
| miR-2392 (miRNAs<br>w/seed AGGAUGG)                 | mature<br>microRNA | Activated | 2.186 | 4.13E-02 | bias | CHGA,CXCL10,KLRC4-KLRK1/KLRK1,LAT,PLEKHG5                                 |
| miR-3614-3p<br>(miRNAs w/seed<br>AGCCUUC)           | mature<br>microRNA | Activated | 2.169 | 4.23E-02 | bias | CNNM1,GALNT13,RUNX2,TNFAIP3,TNIK                                          |
| miR-3594-5p (and<br>other miRNAs w/seed<br>CCAGGGC) | mature<br>microRNA | Activated | 3.247 | 4.25E-02 | bias | AFF2,CCL22,CD8A,CD8B,CHGA,CSF1,MAPK11,MARCKSL1,PLEKHG5,SMOC<br>1,TBXA2R   |
| miR-4650-3p<br>(miRNAs w/seed<br>GGUAGAA)           | mature<br>microRNA | Activated | 2.236 | 4.29E-02 | bias | AASS,CCL5,FLT3,GALNT13,GZMK                                               |
| miR-3657 (and other<br>miRNAs w/seed<br>GUGUCCC)    | mature<br>microRNA | Activated | 2.383 | 4.44E-02 | bias | AFF2,CD8B,CNNM1,COL17A1,CSF1,EXTL1                                        |
| miR-4324 (miRNAs<br>w/seed CCUGAGA)                 | mature<br>microRNA | Activated | 2.425 | 4.60E-02 | bias | C17orf104,CCL22,CD5L,LAD1,RGS10,SMOC1                                     |
| miR-4640-5p (and<br>other miRNAs w/seed<br>GGGCCAG) | mature<br>microRNA | Activated | 3.286 | 4.64E-02 | bias | CCL22,CD5L,CNNM1,CSF1,EXTL1,MARCKSL1,OBSL1,OSBP2,PRF1,RUNX2,S<br>MOC1     |
| miR-2355-3p<br>(miRNAs w/seed<br>UUGUCCU)           | mature<br>microRNA | Activated | 2.183 | 4.92E-02 | bias | AASS,KLRC4-KLRK1/KLRK1,MMP25,TMEM178A,TNIK                                |

|                                                |                 |           |       |          |      |                                                                  |
|------------------------------------------------|-----------------|-----------|-------|----------|------|------------------------------------------------------------------|
| miR-1273h-5p (and other miRNAs w/seed UGGGAGG) | mature microRNA | Activated | 3.069 | 4.95E-02 | bias | AASS,AFF2,CCL22,CNNM1,CXCL10,GRHL3,MARCKSL1,TBXA2R,TMEM178A,TNIK |
|------------------------------------------------|-----------------|-----------|-------|----------|------|------------------------------------------------------------------|
